# Supplementary material for: Modern Innovative Solutions to Improve Outcomes in Severe Asthma: Protocol for a Mixed Methods Observational Comparison of Clinical Outcomes in MISSION Versus Current Care Delivery
Source: PubMed Central journal article supplement (PMC6913683; doi:10.2196/resprot.9585), 2019-10-10

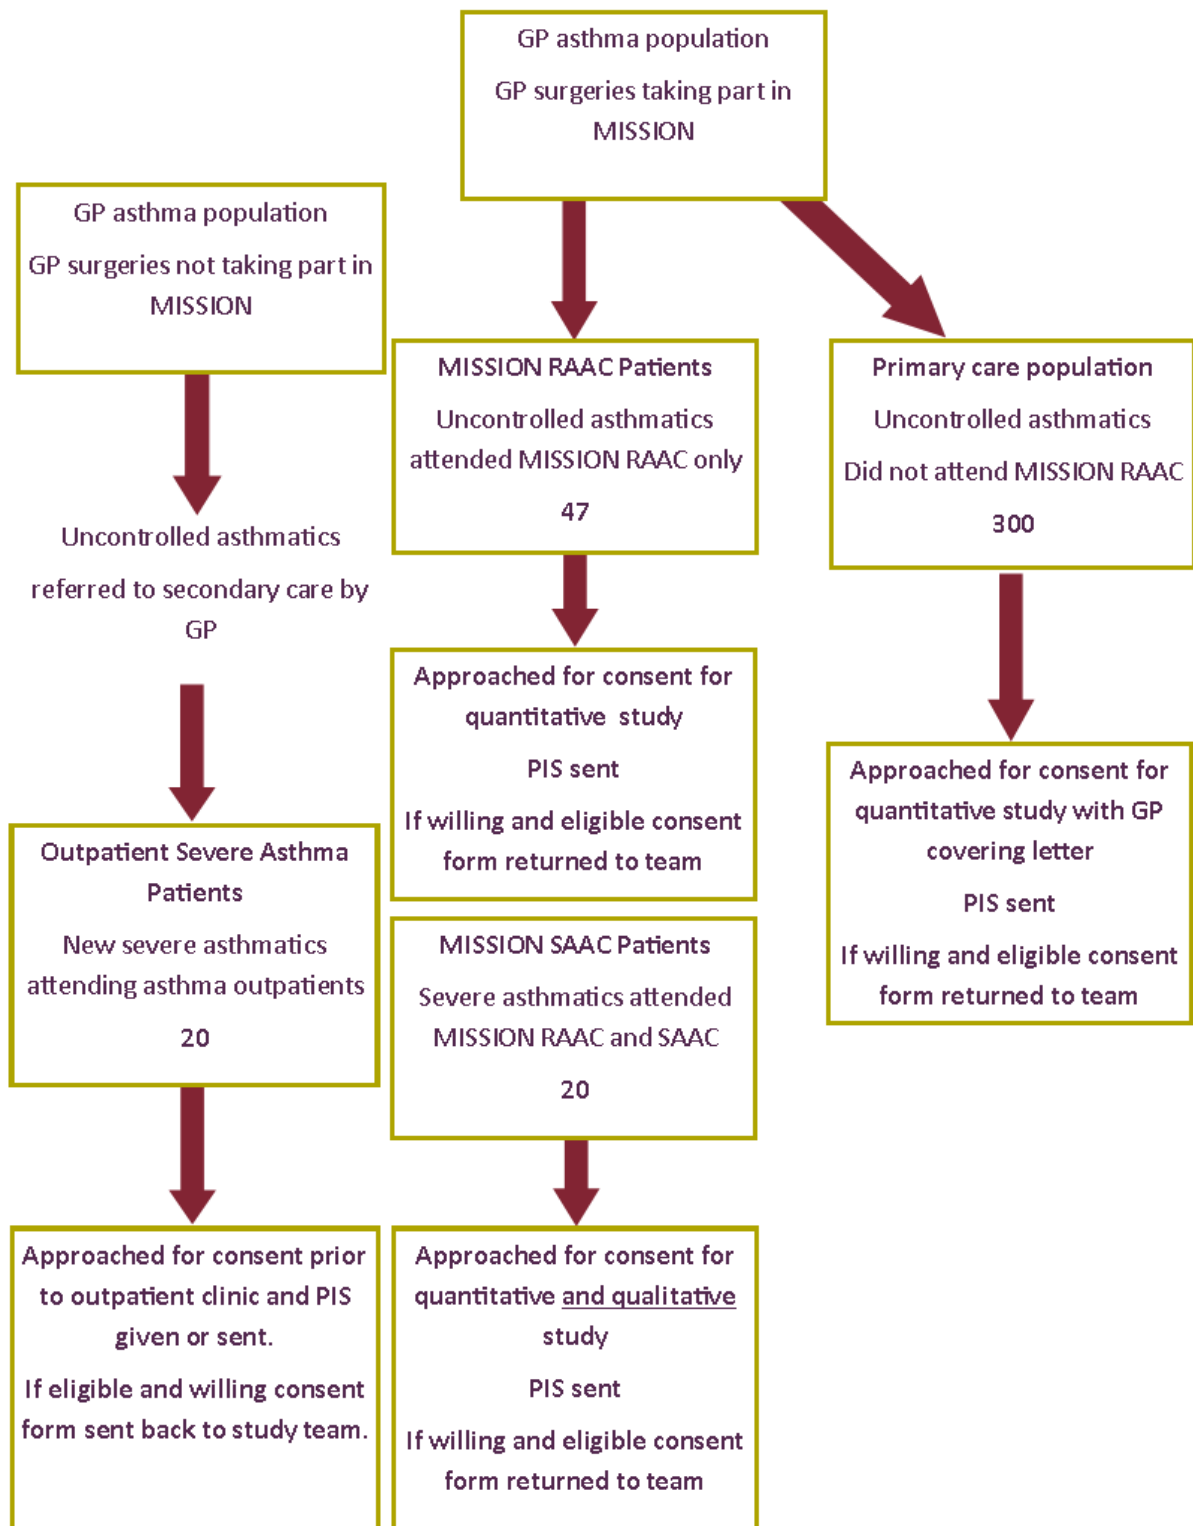

Supplement: resprot_v8i10e9585_app1.pdf [file resprot_v8i10e9585_app1.pdf]
