# Supplementary material for: Modern Innovative Solutions to Improve Outcomes in Severe Asthma: Protocol for a Mixed Methods Observational Comparison of Clinical Outcomes in MISSION Versus Current Care Delivery
Source: PubMed Central journal article supplement (PMC6913683; doi:10.2196/resprot.9585), 2019-10-10
Supplement: resprot_v8i10e9585_app2.pdf [file resprot_v8i10e9585_app2.pdf]

| RAPID ACCESS ASTHMA CLINIC CRF INDEX |             |                        |
|--------------------------------------|-------------|------------------------|
| Station                              | Page number | Complete – please sign |
| Patient data/height/weight           | 2           |                        |
| Medical review                       | 3           |                        |
| Spirometry                           | 11          |                        |
| Inhaler technique and peak flow      | 12          |                        |
| Questionnaires                       | 13          |                        |
| Skin prick testing                   | 14          |                        |
| Self management plans                | 15          |                        |
| Education                            | 16          |                        |
| Diagnosis                            | 17          |                        |
| Treatment                            | 18          |                        |
| Follow up                            | 19          |                        |

| WELCOME - PATIENT DATA/HEIGHT/WEIGHT |                |                                                               |   |  |   |
|--------------------------------------|----------------|---------------------------------------------------------------|---|--|---|
| <b>1. Patient Name</b>               |                |                                                               |   |  |   |
|                                      | <b>Address</b> |                                                               |   |  |   |
|                                      |                |                                                               |   |  |   |
|                                      |                |                                                               |   |  |   |
| <b>2. Patient's Date of Birth:</b>   |                | DD/MM/YYYY                                                    |   |  |   |
|                                      | <b>Age</b>     |                                                               |   |  |   |
| <b>3. Gender</b>                     |                | <input type="checkbox"/> Male <input type="checkbox"/> Female |   |  |   |
| <b>4. Height</b>                     |                |                                                               | . |  | m |

|           |  |  |  |   |  |                   |
|-----------|--|--|--|---|--|-------------------|
| 5. Weight |  |  |  | . |  | Kg                |
| 6. BMI    |  |  |  | . |  | Kg/m <sup>2</sup> |

| <b>STATION – MEDICAL REVIEW</b>                      |                                                          |
|------------------------------------------------------|----------------------------------------------------------|
| <b>1. Asthma history including date of diagnosis</b> |                                                          |
| Wheeze                                               | <input type="checkbox"/> Yes <input type="checkbox"/> No |
| Cough                                                | <input type="checkbox"/> Yes <input type="checkbox"/> No |
| Shortness of breath                                  | <input type="checkbox"/> Yes <input type="checkbox"/> No |
|                                                      |                                                          |
|                                                      |                                                          |
|                                                      |                                                          |
|                                                      |                                                          |
|                                                      |                                                          |

|                                               |                                                                                |
|-----------------------------------------------|--------------------------------------------------------------------------------|
| <b>2. Exacerbation history last 12 months</b> |                                                                                |
| Steroid courses – oral or IM                  | <input type="checkbox"/> Yes <input type="checkbox"/> No Number _____          |
| Exacerbations managed by GP                   | <input type="checkbox"/> Yes <input type="checkbox"/> No Number _____          |
| Exacerbations requiring nebuliser             | <input type="checkbox"/> Yes <input type="checkbox"/> No Number _____          |
| Attendances at ED                             | <input type="checkbox"/> Yes <input type="checkbox"/> No Number _____          |
| Hospital admissions                           | <input type="checkbox"/> Yes <input type="checkbox"/> No Number _____          |
| HDU/Respiratory High Care admissions          | <input type="checkbox"/> Yes <input type="checkbox"/> No Number _____          |
| ITU admission                                 | <input type="checkbox"/> Yes <input type="checkbox"/> No Number _____          |
| <b>Hospital</b>                               | <b>Admission Date</b> <span style="float: right;"><b>Discharge Date</b></span> |

|  |  |  |
|--|--|--|
|  |  |  |
|  |  |  |
|  |  |  |

| 3. Allergy triggers                                              |                                                          | Symptom on exposure, please tick                         |                                                          |                                                          |
|------------------------------------------------------------------|----------------------------------------------------------|----------------------------------------------------------|----------------------------------------------------------|----------------------------------------------------------|
|                                                                  |                                                          | Eyes*                                                    | Nose*                                                    | Chest*                                                   |
| House dust mite eg vacuuming, dusting                            |                                                          | <input type="checkbox"/> Yes <input type="checkbox"/> No | <input type="checkbox"/> Yes <input type="checkbox"/> No | <input type="checkbox"/> Yes <input type="checkbox"/> No |
| Cat                                                              |                                                          | <input type="checkbox"/> Yes <input type="checkbox"/> No | <input type="checkbox"/> Yes <input type="checkbox"/> No | <input type="checkbox"/> Yes <input type="checkbox"/> No |
| Cat at home                                                      | <input type="checkbox"/> Yes <input type="checkbox"/> No |                                                          |                                                          |                                                          |
| Dog                                                              |                                                          | <input type="checkbox"/> Yes <input type="checkbox"/> No | <input type="checkbox"/> Yes <input type="checkbox"/> No | <input type="checkbox"/> Yes <input type="checkbox"/> No |
| Dog at home                                                      | <input type="checkbox"/> Yes <input type="checkbox"/> No |                                                          |                                                          |                                                          |
| Mould                                                            |                                                          | <input type="checkbox"/> Yes <input type="checkbox"/> No | <input type="checkbox"/> Yes <input type="checkbox"/> No | <input type="checkbox"/> Yes <input type="checkbox"/> No |
| Grass                                                            |                                                          | <input type="checkbox"/> Yes <input type="checkbox"/> No | <input type="checkbox"/> Yes <input type="checkbox"/> No | <input type="checkbox"/> Yes <input type="checkbox"/> No |
| Trees                                                            |                                                          | <input type="checkbox"/> Yes <input type="checkbox"/> No | <input type="checkbox"/> Yes <input type="checkbox"/> No | <input type="checkbox"/> Yes <input type="checkbox"/> No |
| Other                                                            |                                                          | <input type="checkbox"/> Yes <input type="checkbox"/> No | <input type="checkbox"/> Yes <input type="checkbox"/> No | <input type="checkbox"/> Yes <input type="checkbox"/> No |
| *Eye symptoms – redness,itching, watering                        |                                                          |                                                          |                                                          |                                                          |
| *Nasal symptoms – runny, itchy, stuffy nose/sneezing             |                                                          |                                                          |                                                          |                                                          |
| *Chest symptoms – wheeze, cough, chest tightness, breathlessness |                                                          |                                                          |                                                          |                                                          |

| 4. Other atopy |                                                          |
|----------------|----------------------------------------------------------|
| Eczema         | <input type="checkbox"/> Yes <input type="checkbox"/> No |
| Migraine       | <input type="checkbox"/> Yes <input type="checkbox"/> No |

| <b>5. Other asthma triggers – <i>Patient to complete</i></b> |                                                          |
|--------------------------------------------------------------|----------------------------------------------------------|
| Infections (viral/common cold, etc.)                         | <input type="checkbox"/> Yes <input type="checkbox"/> No |
| Cigarette smoke                                              | <input type="checkbox"/> Yes <input type="checkbox"/> No |
| Exercise                                                     | <input type="checkbox"/> Yes <input type="checkbox"/> No |
| Stress                                                       | <input type="checkbox"/> Yes <input type="checkbox"/> No |
| Temperature changes                                          | <input type="checkbox"/> Yes <input type="checkbox"/> No |
| Drugs (eg NSAIDs/beta blockers)                              | <input type="checkbox"/> Yes <input type="checkbox"/> No |
| Food                                                         | <input type="checkbox"/> Yes <input type="checkbox"/> No |
| Alcohol                                                      | <input type="checkbox"/> Yes <input type="checkbox"/> No |
| Hormonal (pre-menstrual/pregnancy)                           | <input type="checkbox"/> Yes <input type="checkbox"/> No |
| Other                                                        | <input type="checkbox"/> Yes <input type="checkbox"/> No |
| Please specify:<br>_____                                     |                                                          |

|                                                                                       |                                                          |
|---------------------------------------------------------------------------------------|----------------------------------------------------------|
| <b>6. Occupation</b>                                                                  |                                                          |
| Retired                                                                               | <input type="checkbox"/> Yes <input type="checkbox"/> No |
| Unemployed                                                                            | <input type="checkbox"/> Yes <input type="checkbox"/> No |
| <b>7. Any exposure to fumes, chemicals, aerosols or dust at work</b>                  |                                                          |
| <input type="checkbox"/> Yes <input type="checkbox"/> No                              |                                                          |
| Details:<br>_____<br>_____                                                            |                                                          |
| <b>8. Are asthma symptoms worse at work or improve on holiday</b>                     |                                                          |
| <input type="checkbox"/> Yes <input type="checkbox"/> No <input type="checkbox"/> N/A |                                                          |
| Details:<br>_____<br>_____                                                            |                                                          |

|                                                                                                                                                              |                                                                                       |
|--------------------------------------------------------------------------------------------------------------------------------------------------------------|---------------------------------------------------------------------------------------|
| <b>9. Any hobbies that may cause exposure to allergic triggers, chemicals, dust, mould</b> (eg horse riding, soldering, woodwind instruments, woodwork, DIY) | <input type="checkbox"/> Yes <input type="checkbox"/> No                              |
| Details:<br>_____<br>_____                                                                                                                                   |                                                                                       |
| <b>10. Are asthma symptoms triggered by hobbies</b>                                                                                                          | <input type="checkbox"/> Yes <input type="checkbox"/> No <input type="checkbox"/> N/A |
| Details:<br>_____<br>_____                                                                                                                                   |                                                                                       |

|                                   |                                                          |
|-----------------------------------|----------------------------------------------------------|
| <b>11. Past medical history</b>   |                                                          |
| <b>Cardiovascular disease</b>     | <input type="checkbox"/> Yes <input type="checkbox"/> No |
| Please specify:<br>_____<br>_____ |                                                          |
| <b>Other respiratory disease</b>  | <input type="checkbox"/> Yes <input type="checkbox"/> No |
| Please specify:<br>_____          |                                                          |
| <b>ENT disease</b>                | <input type="checkbox"/> Yes <input type="checkbox"/> No |
| Please specify:<br>_____<br>_____ |                                                          |
| <b>GI/abdominal disease</b>       | <input type="checkbox"/> Yes <input type="checkbox"/> No |
| Please specify:<br>_____<br>_____ |                                                          |
| <b>Other</b>                      | <input type="checkbox"/> Yes <input type="checkbox"/> No |

Please specify:

|  |
|--|
|  |
|  |

|                         |                                                          |
|-------------------------|----------------------------------------------------------|
| <b>12. Drug allergy</b> | <input type="checkbox"/> Yes <input type="checkbox"/> No |
|-------------------------|----------------------------------------------------------|

|                |
|----------------|
| <b>Details</b> |
|                |
|                |

|                                   |                                                          |
|-----------------------------------|----------------------------------------------------------|
| <b>13. History of anaphylaxis</b> | <input type="checkbox"/> Yes <input type="checkbox"/> No |
|-----------------------------------|----------------------------------------------------------|

|                |
|----------------|
| <b>Details</b> |
|                |
|                |

| <b>14. Current medications, inhalers, nebulisers, nasal sprays and topical medication including over the counter medication</b> |                                                              |                  |                                                         |                                     |                               |
|---------------------------------------------------------------------------------------------------------------------------------|--------------------------------------------------------------|------------------|---------------------------------------------------------|-------------------------------------|-------------------------------|
| <b>Drug</b><br><i>Generic name in CAPITALS</i>                                                                                  | <b>Prescribed dose</b><br><i>Include units and frequency</i> | <b>OTC or GP</b> | <b>Route</b><br><i>Po/sc/pr/<br/>patch/neb/<br/>inh</i> | <b>With spacer</b><br><i>Y/N/NA</i> | <b>Adherent</b><br><i>Y/N</i> |
|                                                                                                                                 |                                                              |                  |                                                         |                                     |                               |
|                                                                                                                                 |                                                              |                  |                                                         |                                     |                               |
|                                                                                                                                 |                                                              |                  |                                                         |                                     |                               |
|                                                                                                                                 |                                                              |                  |                                                         |                                     |                               |
|                                                                                                                                 |                                                              |                  |                                                         |                                     |                               |
|                                                                                                                                 |                                                              |                  |                                                         |                                     |                               |
|                                                                                                                                 |                                                              |                  |                                                         |                                     |                               |
|                                                                                                                                 |                                                              |                  |                                                         |                                     |                               |
|                                                                                                                                 |                                                              |                  |                                                         |                                     |                               |
|                                                                                                                                 |                                                              |                  |                                                         |                                     |                               |

|                                  |                          |                                                       |       |  |            |
|----------------------------------|--------------------------|-------------------------------------------------------|-------|--|------------|
|                                  |                          |                                                       |       |  |            |
| <b>15. Smoking status</b>        |                          |                                                       |       |  |            |
| Current smoker                   | <input type="checkbox"/> | Pack years                                            | _____ |  |            |
| Ex-smoker                        | <input type="checkbox"/> | Pack year defined as 20 cigarettes per day for 1 year |       |  |            |
| Never smoked                     | <input type="checkbox"/> |                                                       |       |  |            |
| <b>16. If smoker, expired CO</b> |                          |                                                       |       |  | <b>ppb</b> |

| <b>STATION - SPIROMETRY</b>          |                            |               |
|--------------------------------------|----------------------------|---------------|
| <b>1. Lung function</b>              | <b>FEV1</b>                | <b>Litres</b> |
| <i>Attach spirometry chart below</i> | <b>FEV1 % predicted</b>    | <b>%</b>      |
|                                      | <b>FVC</b>                 | <b>Litres</b> |
|                                      | <b>FVC % predicted</b>     | <b>%</b>      |
|                                      | <b>FEV1/FVC ratio</b>      | <b>%</b>      |
|                                      | <b>Peak flow</b>           | <b>l/min</b>  |
|                                      | <b>Predicted peak flow</b> | <b>l/min</b>  |

|                |  |  |  |            |
|----------------|--|--|--|------------|
| <b>2. FeNO</b> |  |  |  | <b>ppb</b> |
|----------------|--|--|--|------------|

| <b>STATION – INHALER TECHNIQUE AND PEAK FLOW</b> |                              |                                |
|--------------------------------------------------|------------------------------|--------------------------------|
| <b>1. Has patient brought their inhalers in</b>  | <input type="checkbox"/> Yes | <input type="checkbox"/> No    |
| <b>2. Inspiratory flow checked</b>               | <input type="checkbox"/> Yes | <input type="checkbox"/> No    |
| <b>3. Current inhaler devices</b>                | MDI alone                    | <input type="checkbox"/> L/Min |
|                                                  | MDI plus spacer              | <input type="checkbox"/> L/Min |

|                                                                 |                      |                              |                             |
|-----------------------------------------------------------------|----------------------|------------------------------|-----------------------------|
|                                                                 | Turbohaler           | <input type="checkbox"/>     | L/Min                       |
|                                                                 | Accuhaler            | <input type="checkbox"/>     | L/Min                       |
|                                                                 | Other please specify | <input type="checkbox"/>     | L/Min                       |
| <b>4. Recommended inhaler device</b>                            | MDI alone            | <input type="checkbox"/>     |                             |
|                                                                 | MDI plus spacer      | <input type="checkbox"/>     |                             |
|                                                                 | Turbohaler           | <input type="checkbox"/>     |                             |
|                                                                 | Accuhaler            | <input type="checkbox"/>     |                             |
|                                                                 | Other please specify | <input type="checkbox"/>     |                             |
| <b>5. Inhaler technique checked</b>                             |                      | <input type="checkbox"/> Yes | <input type="checkbox"/> No |
| <b>6. Inhaler technique improved</b>                            |                      | <input type="checkbox"/> Yes | <input type="checkbox"/> No |
| <b>7. Inhaler information sheet given</b>                       |                      | <input type="checkbox"/> Yes | <input type="checkbox"/> No |
| <b>8. Peak flow (mini Wright) – add value to SMP on page 15</b> |                      |                              | L/Min                       |
| <b>9. Peak flow meter given</b>                                 |                      | <input type="checkbox"/> Yes | <input type="checkbox"/> No |

| <b>STATION - Patient Questionnaires</b>   |                                                          |
|-------------------------------------------|----------------------------------------------------------|
| <b>1. ACQ 7 complete</b>                  | <input type="checkbox"/> Yes <input type="checkbox"/> No |
| <i>NB. include item 7 FEV1 %predicted</i> | Score:                                                   |
| <b>2. AQLQ complete</b>                   | <input type="checkbox"/> Yes <input type="checkbox"/> No |
|                                           | Score:                                                   |
| <b>3. SNOT 22 complete</b>                | <input type="checkbox"/> Yes <input type="checkbox"/> No |
|                                           | Score:                                                   |



|                                   |        |                                                          |                                            |
|-----------------------------------|--------|----------------------------------------------------------|--------------------------------------------|
| <b>4. Epworth complete</b>        |        | <input type="checkbox"/> Yes <input type="checkbox"/> No |                                            |
|                                   | Score: |                                                          |                                            |
| <b>5. HADS complete</b>           |        | <input type="checkbox"/> Yes <input type="checkbox"/> No |                                            |
|                                   | Score: | <b>Anxiety</b> <input type="checkbox"/>                  | <b>Depression</b> <input type="checkbox"/> |
| <b>6. Nijmegen complete</b>       |        | <input type="checkbox"/> Yes <input type="checkbox"/> No |                                            |
|                                   | Score: |                                                          |                                            |
| <b>7. GERDQ complete</b>          |        | <input type="checkbox"/> Yes <input type="checkbox"/> No |                                            |
|                                   | Score: |                                                          |                                            |
| <b>8. Patient survey complete</b> |        | <input type="checkbox"/> Yes <input type="checkbox"/> No |                                            |
|                                   | Score: |                                                          |                                            |

| <b>STATION – Skin Prick Testing and SMP</b>                         |                        |          |                                                          |
|---------------------------------------------------------------------|------------------------|----------|----------------------------------------------------------|
| <b>1. ANY HISTORY OF ANAPHYLAXIS? IF YES, AVOID SKIN PRICK TEST</b> |                        |          | <input type="checkbox"/> Yes <input type="checkbox"/> No |
| <b>2. On antihistamines? If yes, interpret with caution</b>         |                        |          | <input type="checkbox"/> Yes <input type="checkbox"/> No |
| <b>3. Type of test</b>                                              | Result (please circle) |          | Wheal (size in mm)                                       |
| <b>Positive control</b>                                             | positive               | negative | X mm                                                     |
| <b>Negative control</b>                                             | positive               | negative | X mm                                                     |
| <b>Cat</b>                                                          | positive               | negative | X mm                                                     |
| <b>Dog</b>                                                          | positive               | negative | X mm                                                     |
| <b>House dust mite</b>                                              | positive               | negative | X mm                                                     |
| <b>Aspergillus</b>                                                  | positive               | negative | X mm                                                     |

|                     |          |          |   |    |
|---------------------|----------|----------|---|----|
| <b>Grass pollen</b> | positive | negative | X | mm |
| <b>Tree pollen</b>  | positive | negative | X | mm |

### QUESTIONNAIRES

|                                                     |                                                          |
|-----------------------------------------------------|----------------------------------------------------------|
| <b>1. Remind patient to complete questionnaires</b> | <input type="checkbox"/> Yes <input type="checkbox"/> No |
|-----------------------------------------------------|----------------------------------------------------------|

### SMP

|                                                  |                                                          |
|--------------------------------------------------|----------------------------------------------------------|
| <b>1. Self-management plan devised</b>           | <input type="checkbox"/> Yes <input type="checkbox"/> No |
| <b>2. Peak flow on mini Wright (see page 12)</b> |                                                          |
| <b>3. Predicated peak flow</b>                   |                                                          |
| <b>4. Peak flow 75 – 85%</b>                     |                                                          |
| <b>5. Peak flow 50 – 75%</b>                     |                                                          |
| <b>6. Peak flow &lt;50%</b>                      |                                                          |

### STATION – Education session

|                                        |                                                          |
|----------------------------------------|----------------------------------------------------------|
| <b>1. Patient attended</b>             | <input type="checkbox"/> Yes <input type="checkbox"/> No |
| <b>2. Partner or Carer(s) attended</b> | <input type="checkbox"/> Yes <input type="checkbox"/> No |

### Education content

|                                         |                                                          |
|-----------------------------------------|----------------------------------------------------------|
| <b>1. Asthma education and triggers</b> | <input type="checkbox"/> Yes <input type="checkbox"/> No |
| <b>2. Asthma self-management</b>        | <input type="checkbox"/> Yes <input type="checkbox"/> No |
| <b>3. Smoking cessation</b>             | <input type="checkbox"/> Yes <input type="checkbox"/> No |

| <b>SMP</b>                          |                                                          |
|-------------------------------------|----------------------------------------------------------|
| <b>Self-management plan devised</b> | <input type="checkbox"/> Yes <input type="checkbox"/> No |

| <b>OUTCOME - Diagnosis</b> |                                                          |                                                          |
|----------------------------|----------------------------------------------------------|----------------------------------------------------------|
| <b>1. Asthma?</b>          | <input type="checkbox"/> Yes <input type="checkbox"/> No |                                                          |
| If no, please specify      |                                                          |                                                          |
| <b>2. Controlled?</b>      | <input type="checkbox"/> Yes <input type="checkbox"/> No |                                                          |
| <b>3. Allergic?</b>        | <input type="checkbox"/> Yes <input type="checkbox"/> No |                                                          |
| <b>4. Inflammation?</b>    | <input type="checkbox"/> Yes <input type="checkbox"/> No |                                                          |
| <b>5. Co - morbidity?</b>  | <input type="checkbox"/> Yes <input type="checkbox"/> No |                                                          |
|                            | <b>GORD?</b>                                             | <input type="checkbox"/> Yes <input type="checkbox"/> No |
|                            | <b>Rhinosinusitis?</b>                                   | <input type="checkbox"/> Yes <input type="checkbox"/> No |
|                            | <b>Other?</b>                                            | <input type="checkbox"/> Yes <input type="checkbox"/> No |
| Details                    |                                                          |                                                          |

| <b>OUTCOME - Treatment</b>                                |                                                                     |
|-----------------------------------------------------------|---------------------------------------------------------------------|
| <b>1. Any recommended change to inhaled medication?</b>   | <input type="checkbox"/> Yes <input type="checkbox"/> No            |
|                                                           | <input type="checkbox"/> Step up <input type="checkbox"/> Step down |
| If yes, please specify:                                   |                                                                     |
| <b>2. Any recommended change to medication adherence?</b> | <input type="checkbox"/> Yes <input type="checkbox"/> No            |
| If yes, please specify:                                   |                                                                     |

|                                                        |                             |                                                          |
|--------------------------------------------------------|-----------------------------|----------------------------------------------------------|
| <b>3. Any recommended change to other medications?</b> |                             | <input type="checkbox"/> Yes <input type="checkbox"/> No |
|                                                        | <b>PPI</b>                  | <input type="checkbox"/> Yes <input type="checkbox"/> No |
|                                                        | <b>Nasal corticosteroid</b> | <input type="checkbox"/> Yes <input type="checkbox"/> No |
|                                                        | <b>Antihistamine</b>        | <input type="checkbox"/> Yes <input type="checkbox"/> No |
|                                                        | <b>Other</b>                | <input type="checkbox"/> Yes <input type="checkbox"/> No |
| Details:                                               |                             |                                                          |

| <b>OUTCOME – Follow up</b>                            |                                                          |
|-------------------------------------------------------|----------------------------------------------------------|
| <b>1. Further investigations recommended?</b>         | <input type="checkbox"/> Yes <input type="checkbox"/> No |
| Details:                                              |                                                          |
|                                                       |                                                          |
| <b>2. Follow up recommendations</b>                   |                                                          |
| <b>GP follow up (with 1-year plan)</b>                | <input type="checkbox"/> Yes <input type="checkbox"/> No |
| <b>Research clinic follow up</b>                      | <input type="checkbox"/> Yes <input type="checkbox"/> No |
| <b>SAAC follow up</b>                                 | <input type="checkbox"/> Yes <input type="checkbox"/> No |
| <b>Referral to other secondary care (GP to refer)</b> | <input type="checkbox"/> Yes <input type="checkbox"/> No |
| Details:                                              |                                                          |
|                                                       |                                                          |

| SECTION 1 FeNO and exhaled CO |     |
|-------------------------------|-----|
| FeNO                          | ppb |
| CO                            | ppb |

| SECTION 2 - QUESTIONAIRES       |                                                                      |
|---------------------------------|----------------------------------------------------------------------|
| 1. ACQ complete                 | <input type="checkbox"/> Yes <input type="checkbox"/> No             |
| Score:                          |                                                                      |
| 2. AQLQ complete                | <input type="checkbox"/> Yes <input type="checkbox"/> No             |
| Score:                          |                                                                      |
| 3. SNOT 22 complete (OPTIONAL)  | <input type="checkbox"/> Yes <input type="checkbox"/> No             |
| Score:                          |                                                                      |
| 4. Epworth complete (OPTIONAL)  | <input type="checkbox"/> Yes <input type="checkbox"/> No             |
| Score:                          |                                                                      |
| 5. HADS complete (OPTIONAL)     | <input type="checkbox"/> Yes <input type="checkbox"/> No             |
| Score:                          | Anxiety <input type="checkbox"/> Depression <input type="checkbox"/> |
| 6. Nijmegen complete (OPTIONAL) | <input type="checkbox"/> Yes <input type="checkbox"/> No             |
| Score:                          |                                                                      |
| 7. GERDQ complete (OPTIONAL)    | <input type="checkbox"/> Yes <input type="checkbox"/> No             |
| Score:                          |                                                                      |

### SECTION 3 - ASTHMA HISTORY

#### 1. Review of asthma history

Triggers  
Exacerbations  
Medication  
Occupation  
Hobbies  
Co morbidity  
Reflux  
Past medical history  
smoking

#### 2. Relevant past medical history

|  |
|--|
|  |
|  |
|  |
|  |
|  |

|                                  |                                                          |
|----------------------------------|----------------------------------------------------------|
| <b>3. Drug allergy</b>           | <input type="checkbox"/> Yes <input type="checkbox"/> No |
| <b>Details</b>                   |                                                          |
|                                  |                                                          |
|                                  |                                                          |
| <b>4. History of anaphylaxis</b> | <input type="checkbox"/> Yes <input type="checkbox"/> No |
| <b>Details</b>                   |                                                          |
|                                  |                                                          |
|                                  |                                                          |

| <b>5. Current medications, inhalers, nebulisers, nasal sprays and topical medication including over the counter medication</b> |                                                              |                  |                                                         |                                     |                               |
|--------------------------------------------------------------------------------------------------------------------------------|--------------------------------------------------------------|------------------|---------------------------------------------------------|-------------------------------------|-------------------------------|
| <b>Drug</b><br><i>Generic name in CAPITALS</i>                                                                                 | <b>Prescribed dose</b><br><i>Include units and frequency</i> | <b>OTC or GP</b> | <b>Route</b><br><i>Po/sc/pr/<br/>patch/neb/<br/>inh</i> | <b>With spacer</b><br><i>Y/N/NA</i> | <b>Adherent</b><br><i>Y/N</i> |
|                                                                                                                                |                                                              |                  |                                                         |                                     |                               |
|                                                                                                                                |                                                              |                  |                                                         |                                     |                               |
|                                                                                                                                |                                                              |                  |                                                         |                                     |                               |
|                                                                                                                                |                                                              |                  |                                                         |                                     |                               |
|                                                                                                                                |                                                              |                  |                                                         |                                     |                               |
|                                                                                                                                |                                                              |                  |                                                         |                                     |                               |
|                                                                                                                                |                                                              |                  |                                                         |                                     |                               |





|                |
|----------------|
| <b>Result:</b> |
|                |
|                |

**SECTION 5 - PATHOLOGY**

|                                   |                              |                             |
|-----------------------------------|------------------------------|-----------------------------|
| <b>1. Blood tests taken today</b> | <input type="checkbox"/> Yes | <input type="checkbox"/> No |
|-----------------------------------|------------------------------|-----------------------------|

Please specify:

|  |
|--|
|  |
|--|

| Test            | Date | Result |
|-----------------|------|--------|
| WCC             |      |        |
| Eosinophils     |      |        |
| Total IgE       |      |        |
| Aspergillus IgE |      |        |
| Aspergillus IgG |      |        |

**2. Skin Prick test**

|                                     |                              |                             |
|-------------------------------------|------------------------------|-----------------------------|
| <b>Skin prick test done at RAAC</b> | <input type="checkbox"/> Yes | <input type="checkbox"/> No |
|-------------------------------------|------------------------------|-----------------------------|

**Result:**

If no or inconclusive then repeat or send venous sample

|                                                                     |                              |                             |
|---------------------------------------------------------------------|------------------------------|-----------------------------|
| <b>3. ANY HISTORY OF ANAPHYLAXIS? IF YES, AVOID SKIN PRICK TEST</b> | <input type="checkbox"/> Yes | <input type="checkbox"/> No |
|---------------------------------------------------------------------|------------------------------|-----------------------------|

|                                                             |                              |                             |
|-------------------------------------------------------------|------------------------------|-----------------------------|
| <b>4. On antihistamines? If yes, interpret with caution</b> | <input type="checkbox"/> Yes | <input type="checkbox"/> No |
|-------------------------------------------------------------|------------------------------|-----------------------------|

| 5. Type of test         | Result (please circle) |          | Wheal (size in mm) |
|-------------------------|------------------------|----------|--------------------|
| <b>Positive control</b> | positive               | negative | X mm               |

|                         |          |          |   |    |
|-------------------------|----------|----------|---|----|
| <b>Negative control</b> | positive | negative | X | mm |
| <b>Cat</b>              | positive | negative | X | mm |
| <b>Dog</b>              | positive | negative | X | mm |
| <b>House dust mite</b>  | positive | negative | X | mm |
| <b>Aspergillus</b>      | positive | negative | X | mm |
| <b>Grass pollen</b>     | positive | negative | X | mm |
| <b>Tree pollen</b>      | positive | negative | X | mm |
|                         | positive | negative | X | mm |
|                         | positive | negative | X | mm |
|                         | positive | negative | X | mm |
|                         | positive | negative | X | mm |
|                         | positive | negative | X | mm |
|                         | positive | negative | X | mm |

### SECTION 6 - LUNG FUNCTION

|                                           |                              |                             |
|-------------------------------------------|------------------------------|-----------------------------|
| <b>1. Spirometry</b>                      | <input type="checkbox"/> Yes | <input type="checkbox"/> No |
| <b>2. Lung volume</b>                     | <input type="checkbox"/> Yes | <input type="checkbox"/> No |
| <b>3. Resistance</b>                      | <input type="checkbox"/> Yes | <input type="checkbox"/> No |
| <b>4. Reversibility</b>                   | <input type="checkbox"/> Yes | <input type="checkbox"/> No |
| Please file lung function report in notes |                              |                             |

### SECTION 7 - INHALER TECHNIQUE AND SMOKING CESSATION

|                                                 |                              |                             |
|-------------------------------------------------|------------------------------|-----------------------------|
| <b>1. Has patient brought their inhalers in</b> | <input type="checkbox"/> Yes | <input type="checkbox"/> No |
| <b>2. Inspiratory flow checked</b>              | <input type="checkbox"/> Yes | <input type="checkbox"/> No |

|                                           |                      |                              |                             |
|-------------------------------------------|----------------------|------------------------------|-----------------------------|
| <b>3. Current inhaler devices</b>         | MDI alone            | <input type="checkbox"/>     | L/Min                       |
|                                           | MDI plus spacer      | <input type="checkbox"/>     | L/Min                       |
|                                           | Turbohaler           | <input type="checkbox"/>     | L/Min                       |
|                                           | Accuhaler            | <input type="checkbox"/>     | L/Min                       |
|                                           | Other please specify | <input type="checkbox"/>     | L/Min                       |
| <b>4. Recommended inhaler device</b>      | MDI alone            | <input type="checkbox"/>     | L/Min                       |
|                                           | MDI plus spacer      | <input type="checkbox"/>     | L/Min                       |
|                                           | Turbohaler           | <input type="checkbox"/>     | L/Min                       |
|                                           | Accuhaler            | <input type="checkbox"/>     | L/Min                       |
|                                           | Other please specify | <input type="checkbox"/>     | L/Min                       |
| <b>5. Inhaler technique checked</b>       |                      | <input type="checkbox"/> Yes | <input type="checkbox"/> No |
| <b>6. Inhaler technique improved</b>      |                      | <input type="checkbox"/> Yes | <input type="checkbox"/> No |
| <b>7. Inhaler information sheet given</b> |                      | <input type="checkbox"/> Yes | <input type="checkbox"/> No |

|                                          |                              |                             |                              |
|------------------------------------------|------------------------------|-----------------------------|------------------------------|
| <b>8. Smoking cessation advice given</b> | <input type="checkbox"/> Yes | <input type="checkbox"/> No | <input type="checkbox"/> N/A |
| <b>Details:</b>                          |                              |                             |                              |
|                                          |                              |                             |                              |
|                                          |                              |                             |                              |

| SECTION 8 - DIETICIAN |  |  |   |  |                   |             |
|-----------------------|--|--|---|--|-------------------|-------------|
| BMI                   |  |  | . |  | Kg/m <sup>2</sup> | Triggers    |
|                       |  |  |   |  |                   | Salicylates |
|                       |  |  |   |  |                   | Sulphites   |
|                       |  |  |   |  |                   | Reflux      |

|  |                                |
|--|--------------------------------|
|  | <b>Oral allergy<br/>Weight</b> |
|  |                                |
|  |                                |

| <b>SECTION 9 - PHYSIOTHERAPY</b> |     |
|----------------------------------|-----|
| Nijmegen                         | /64 |
|                                  |     |
|                                  |     |
|                                  |     |
|                                  |     |
|                                  |     |
|                                  |     |

| <b>SECTION 10 - PSYCHOLOGY</b> |                |                   |
|--------------------------------|----------------|-------------------|
| HADS Score:                    | <b>Anxiety</b> | <b>Depression</b> |
|                                |                |                   |
|                                |                |                   |
|                                |                |                   |

| <b>SECTION 11 - ENT</b> |              |                                                          |
|-------------------------|--------------|----------------------------------------------------------|
| SNOT 22 score           | Nasendoscopy | <input type="checkbox"/> Yes <input type="checkbox"/> No |
|                         |              |                                                          |

|  |
|--|
|  |
|--|

| <b>SECTION 12 – EXIT MEDICAL REVIEW</b> |
|-----------------------------------------|
|                                         |
|                                         |
|                                         |
|                                         |
|                                         |

| <b>SECTION 13 - MDT</b>      |
|------------------------------|
| <b>Case summary- Medical</b> |
|                              |
|                              |
| <b>Lung function</b>         |
|                              |
|                              |
| <b>Inhaler technique</b>     |
|                              |
|                              |
| <b>Dietician</b>             |
|                              |
|                              |
| <b>Physiotherapy</b>         |

|                                                               |                                                                                            |
|---------------------------------------------------------------|--------------------------------------------------------------------------------------------|
|                                                               |                                                                                            |
|                                                               |                                                                                            |
| <b>Psychology</b>                                             |                                                                                            |
|                                                               |                                                                                            |
|                                                               |                                                                                            |
| <b>ENT</b>                                                    |                                                                                            |
|                                                               |                                                                                            |
|                                                               |                                                                                            |
| <b>Co morbidities</b>                                         |                                                                                            |
| a. Rhinitis                                                   | <input type="checkbox"/> Yes <input type="checkbox"/> No <input type="checkbox"/> Possible |
| b. Food Allergy                                               | <input type="checkbox"/> Yes <input type="checkbox"/> No <input type="checkbox"/> Possible |
| c. Anxiety/Depression                                         | <input type="checkbox"/> Yes <input type="checkbox"/> No <input type="checkbox"/> Possible |
| d. GORD                                                       | <input type="checkbox"/> Yes <input type="checkbox"/> No <input type="checkbox"/> Possible |
| e. Hyperventilation                                           | <input type="checkbox"/> Yes <input type="checkbox"/> No <input type="checkbox"/> Possible |
| f. Obesity                                                    | <input type="checkbox"/> Yes <input type="checkbox"/> No                                   |
| g. VCD                                                        | <input type="checkbox"/> Yes <input type="checkbox"/> No <input type="checkbox"/> Possible |
| h. ABPA                                                       | <input type="checkbox"/> Yes <input type="checkbox"/> No <input type="checkbox"/> Possible |
| i. Asthma/COPD overlap syndrome                               | <input type="checkbox"/> Yes <input type="checkbox"/> No <input type="checkbox"/> Possible |
| j. NSAID sensitivity                                          | <input type="checkbox"/> Yes <input type="checkbox"/> No <input type="checkbox"/> Possible |
| k. Eczema                                                     | <input type="checkbox"/> Yes <input type="checkbox"/> No <input type="checkbox"/> Possible |
| Any other significant co-morbidities likely to affect asthma: |                                                                                            |
| _____                                                         |                                                                                            |
| _____                                                         |                                                                                            |
| _____                                                         |                                                                                            |

| <b>MDT RECOMMENDATIONS</b> |
|----------------------------|
| <b>Medication</b>          |
|                            |
|                            |
|                            |
|                            |
|                            |
|                            |
|                            |
| <b>Investigations</b>      |
|                            |
|                            |
|                            |
|                            |
|                            |
|                            |
|                            |
|                            |
| <b>Follow up</b>           |
|                            |
|                            |
|                            |
|                            |
|                            |
| <b>Research</b>            |
|                            |
|                            |
|                            |
